# Supplementary material for: TMC1 is an essential component of a leak channel that modulates tonotopy and excitability of auditory hair cells in mice
Source: eLife journal article supplement (doi:10.7554/elife.47441), 2019-10-29
Supplement: supp [file elife-47441-supp-v1.zip]

Archive with 19 entries (19 files):
- elife_poa_e47441_Figure_4_figure_supplement_1.ai
- elife_poa_e47441_Figure_2_source_data_1.xlsx
- elife_poa_e47441_Supplementary_file_1.docx
- elife_poa_e47441_Figure_9_Source_Data_1.xlsx
- elife_poa_e47441_Transparent_Reporting_File.pdf
- elife_poa_e47441_Figure_8_figure_supplement_1.ai
- elife_poa_e47441_Figure_1_source_data_1.xlsx
- elife_poa_e47441_Figure_3_figure_supplement_1_source_data_1.xlsx
- elife_poa_e47441_Figure_3_source_data_1.xlsx
- elife_poa_e47441_Figure_2_figure_supplement_1.ai
- elife_poa_e47441_Figure_6_source_data_1.xlsx
- elife_poa_e47441_Figure_7_source_data_1.xlsx
- elife_poa_e47441_Figure_4_figure_supplement_1_source_data_1.xlsx
- elife_poa_e47441_Table_1_source_data_1.xlsx
- elife_poa_e47441_Figure_4_source_data_1.xlsx
- elife_poa_e47441_Figure_8_source_data_1.xlsx
- elife_poa_e47441_Figure_5_source_data_1.xlsx
- elife_poa_e47441_Figure_8_figure_supplement_1_source_data_1.xlsx
- elife_poa_e47441_Figure_3_figure_supplement_1.ai
