# Supplementary material for: TMC1 is an essential component of a leak channel that modulates tonotopy and excitability of auditory hair cells in mice
Source: eLife journal article supplement (doi:10.7554/elife.47441), 2019-10-29
Supplement: supp [file elife-47441-supp-v1.zip › elife_poa_e47441_Figure_2_source_data_1.xlsx]

## Sheet: Figure 2D
eGFP	C1df OE	C1 OE
-25.3273	-25.9415	-20.5372
-8.8712	-6.74825	-84.1957
-10.3476	-12.3323	-35.9534
-14.2881	-16.7597	-44.565
-5.54252	-4.88037	-34.9914
-29.3396	-13.201	-31.847
-25.0834	-5.9668	-32.4313
-21.6532	-10.3529	-55.6991
	-34.9691
	-20.663
	-19.6463

## Sheet: Figure 2F
P1		P3		P6
wild-type	Tmc2 KO	wild-type	Tmc2 KO	wild-type	Tmc2 KO	Lhfpl5 KO
-0.59593	-0.348922	-22.5162	-35.9881	-38.3619	-73.3124	-25.7275
-0.0387	0.0794427	-6.20944	-34.4721	-65.4194	-50.9759	-17.5763
0.10397	0.377988	-25.1275	-15.6923	-66.7191	-64.4884	-22.6569
-2.45715	-0.11321	-7.4198	-22.527	-63.082	-46.866	-16.7977
-2.40653	0.033323	-20.1208	-23.5758	-60.6417	-49.0463	-20.3686
-0.45537		-18.3263		-104.644	-74.4393	-6.79015
-0.65939		-32.2475		-86.2872	-79.4098	-7.96265
				-64.6112	-95.133	-8.3356
				-59.0811	-120.392	-5.2099
				-69.7514	-79.0609	-11.8829
				-57.7787		-11.2579
				-54.9194		-9.11989
