# Supplementary material for: TMC1 is an essential component of a leak channel that modulates tonotopy and excitability of auditory hair cells in mice
Source: eLife journal article supplement (doi:10.7554/elife.47441), 2019-10-29
Supplement: supp [file elife-47441-supp-v1.zip › elife_poa_e47441_Figure_3_figure_supplement_1_source_data_1.xlsx]

## Sheet: Figure3-Supplement 1B
wild-type bundle intact	wild-type bundle removal
-32.6025	-17.0645
-48.9256	-6.39482
-48.0108	-5.84289
-35.473	-3.1586
-47.5703	-15.781
-52.5732	-7.88409
-42.1695	-12.4944
-49.0463	-13.0832
-79.0609
