# Supplementary material for: TMC1 is an essential component of a leak channel that modulates tonotopy and excitability of auditory hair cells in mice
Source: eLife journal article supplement (doi:10.7554/elife.47441), 2019-10-29
Supplement: supp [file elife-47441-supp-v1.zip › elife_poa_e47441_Figure_3_source_data_1.xlsx]

## Sheet: Figure 3C
Background	FJ-NMDG	DHS-NMDG
-103.577	-52.2458	-48.8286
-88.9408	-46.8941	-49.155
-102.016	-61.6298	-61.767
-120.827	-83.4811	-98.5004
-109.133	-88.6599	-60.6081
-122.1	-94.2274	-57.9458
-108.357	-67.9174	-59.6138
-151.507	-81.5949	-80.6086

## Sheet: Figure 3D
0.1	0.3	0.5	1.3	3.0
0.133655	0.545878	0.380762	0.985671	0.814349
0.306771	0.573299	0.585372	0.985653	1.06481
0.192509	0.300343	0.511569	0.923454	0.881015
0.554548	0.359826	0.919817	1.00167	1.04279
0.232576	0.239822	0.425063	1.02835	0.995865
0.376231	0.308404	0.295185	0.869081	0.920721
0.322894	0.596962	0.479584	1.1862	0.947907
0.280166	0.694305	0.405592	0.983723	0.987653
0.181408	0.42981	0.24746	0.977317	1.00131
			1.03818
			1.08469
			1.05012
			1.03745
			0.945438
			1.01301
			0.888074
			1.32286
			0.602608

## Sheet: Figure 3E
wild-type	Tmc1 KO
-44.0395	-22.4589
-51.6527	-23.3726
-55.7441	-13.0784
-42.3477	-10.956
-54.4489	-27.728
-58.0901	-10.6861
-34.863	-15.234
-50.1658	-9.78329
-71.144
