# Supplementary material for: TMC1 is an essential component of a leak channel that modulates tonotopy and excitability of auditory hair cells in mice
Source: eLife journal article supplement (doi:10.7554/elife.47441), 2019-10-29
Supplement: supp [file elife-47441-supp-v1.zip › elife_poa_e47441_Figure_4_figure_supplement_1_source_data_1.xlsx]

## Sheet: Figure4-supplement 1A
	NaCl										MTSET
411C	-19.5553	-21.6884	-21.2409	-29.5069	-25.6445						-17.5539	-22.5978	-20.1413	-23.0553	-21.6542
412C	-37.7648	-39.246	-46.526	-22.9931	-12.4199	-66.7528					-35.9532	-37.439	-48.1972	-25.6217	-14.3767	-67.9843
447C	-13.3845	-15.8848	-8.09495	-26.3988	-26.0048	-21.8555					-12.9811	-13.0886	-13.798	-25.7685	-27.4817	-21.0828
528C	-24.2516	-22.1146	-11.5593	-11.034							-23.6585	-22.824	-11.63	-11.1296
532C	-62.0873	-30.0053	-13.2815	-34.4485	-30.8177						-61.9555	-32.5794	-12.1284	-34.0535	-31.604
569C	-25.6977	-15.4088	-13.8755	-37.9182							-25.3123	-14.3715	-14.7309	-35.792
