# Supplementary material for: TMC1 is an essential component of a leak channel that modulates tonotopy and excitability of auditory hair cells in mice
Source: eLife journal article supplement (doi:10.7554/elife.47441), 2019-10-29
Supplement: supp [file elife-47441-supp-v1.zip › elife_poa_e47441_Figure_4_source_data_1.xlsx]

## Sheet: Figure 4D
TMC1_WT	G411C	M412C	N447C	D528C	T532C	D569C	TMC1_dn
-90.0037	-18.951	-62.8173	-6.3912	-27.329	-5.91205	-19.1951	-32.0114
-59.9126	-31.6436	-79.8652	-14.6863	-18.1183	-57.5596	-15.5649	-6.4238
-42.7754	-12.9943	-18.4001	-14.4989	-7.71692	-25.6458	-17.2821	-8.9633
-49.2758	-13.4197	-31.4505	-8.87065	-25.6699	-12.7968	-28.5153	-20.4199
-35.1561	-25.2354	-40.9927	-18.5312	-22.6723	-14.9726	-11.6209	-22.8298
-41.7903	-45.7262	-36.5287	-17.4017	-25.7799	-39.3587	-10.4516	-50.3808
-39.2822	-32.6155	-4.49145	-19.0907	-13.5363	-33.3969	-39.168	-11.5255
-77.4714	-21.6542	-17.3966	-8.44	-9.4363	-46.701	-35.792	-13.6811
-44.4385	-13.8247	-63.706	-24.32	-11.5784	-49.264	-25	-13.6811
-47.9785	-51.046	-57.77	-18.974	-2.3431	-43.7		-13.6811
-21.475	-14.786	-38.03	-16.849	-71.8571	-36.367		-13.6811
-31.384	-18.49	-35.76	-18.099	-26.758	-21.1		-13.6811
-70.958	-26.226		-11.941	-18.724	-25.757		-13.6811
-41.387	-5.626			-14.768
-36.66	-8.064			-15.254
				-18.38
				-38.292
