# Supplementary material for: TMC1 is an essential component of a leak channel that modulates tonotopy and excitability of auditory hair cells in mice
Source: eLife journal article supplement (doi:10.7554/elife.47441), 2019-10-29
Supplement: supp [file elife-47441-supp-v1.zip › elife_poa_e47441_Figure_5_source_data_1.xlsx]

## Sheet: Figure 5BCDFH
DHS	Leak															MET
0.1	0.813217	0.961073	0.88333	0.964102	1.31483	0.9812	1.00859									1.03723	0.990153	1.23363	1.04834	0.959105	0.964137	1.02108
1	1.0388	0.961187	1.41021	1.26948	1.04959	1.12957	0.898299	0.695471	0.901373	1.09603	1.25218					1.35093	1.15325	0.890663	1.29686	1.0322	0.907377	0.694922	0.961738	0.607326	0.985396	0.957526
10	0.899656	0.540081	1.03755	0.694814	1.14578	0.882897	0.972435	0.772095	0.820126	0.460179	1.22622					0.883322	0.736459	0.965419	0.475227	1.08202	0.623897	0.578644	0.924594	0.166285	0.271386	0.270755
100	0.725074	0.660005	1.08601	0.620011	0.872307	0.883154	0.925769									0.086134	0.106592	0.122113	0.255959	0.104133	0.125811	0.123698
1000	0.311591	0.293332	0.534982	0.531641	0.350251	0.516358	0.428003	0.328287	0.32409	0.227711	0.168147					0.03098	0.030267	0.03095	0.028307	0.038697	0.035681	0.040218	0.029203	0.027424	0.035895	0.025762
10000			0.179008	0.193148	0.010885	0.178137	0.098033	0.264725	0.164843	0.081217	0.138695							0.019302	0.034675	0.022852	0.022746	0.021871	0.02479	0.021262	0.017138	0.017287
40000	0.045171	0.162733	-0.0105	0.055667	0.012945	0.05442	-0.00913									0.021946	0.032241	0.021556	0.036404	0.028709	0.024617	0.030024
dTC	MET nor																				Leak nor
0.0001	0.732755	0.427497	1.11276	1.46191	0.796192	1.87974	1.22816	1.4331	1.39223	0.612854	0.376567	0.350636	0.92817								0.730281	0.507354	0.740155	1.04036	0.599752	1.01679	1.06759	1.07212	1.31061	0.873493	1.26675	1.02975	1.27088
0.001	0.682282	0.459789	1.4264	1.45422	0.758051	1.63332	1.18066	1.51415	1.33344	0.582995	0.378868	0.380265	0.730597								0.72168	0.425031	0.882414	1.07825	0.573534	0.955529	1.14329	1.26039	1.36087	0.863033	1.21452	1.01669	1.31156
0.01	1.30662	0.991616	1.09221	1.16938	0.999602	1.07916	1.05756														1.06222	1.00259	1.02386	0.970555	0.844353	0.851119	0.912343
0.1	0.651564	0.890055	0.883232	0.838781	1.02159																										1.07269	1.1822	1.2247	0.851991	0.563798	0.881005
1	0.662945	0.886173	0.855683	0.478395	0.691575	0.321618	0.77251	0.928755	0.453394	0.446218	0.829576	0.384012	1.01176	0.196161	0.665851						0.993112	0.99874	0.813454	0.779876	0.749408	0.765719	1.14392	1.25416	1.02499	0.854805	1.24162	0.789926	1.30849	0.530397	0.378458	0.871502
10	0.272435	0.548142	0.489027	0.130335	0.519277	0.565303	0.524493	0.296863	0.69112	0.615259											1.07352	0.920616	0.75098	0.525713	0.703026	0.713667	1.17388	0.947647	0.969145	0.875759
50	0.04787	0.061463	0.162323	0.385847	0.43758	0.164376	0.221746	0.298634	0.364748																	0.815137	1.33378	0.801068	1.00227	0.91822	0.771383	0.509753	1.12222	0.471968	-0.21167	0.991115
100	0.271989	0.151932	0.104824	0.099347	0.19574	0.075885	0.093124	0.082212	0.16383	0.076583	0.099702	0.178976	0.072883	0.126358	0.144494						0.555412	0.445933	0.303169	0.376163	0.399171	0.299309	0.655058	0.323645	0.606358	0.465872	0.336321	0.253572	0.492761	-0.04645	0.319284	0.508994
200	0.057056	0.179079	0.041881	0.027285	0.040847																										0.278237	0.193599	0.292041	-0.24504	0.196589	0.301
1000	0.023392	0.028216	0.026698	0.030971	0.028507	0.052583	0.029037	0.036661	0.031916	0.052268											0.257205	0.039318	0.054894	0.020056	0.071329	0.009085	0.15792	0.037742	0.153743	0.05027
amiloride	Leak nor																				MET nor
0.1	0.800674	0.811108	1.14532	0.944272	1.08154	1.16433	0.971852	1.18947	1.0598	1.14481	0.969432	1.1157									1.24705	0.765358	1.17363	0.744727	0.22633	1.03268	0.888499	0.804983	0.804761	1.12756	1.03435	1.09987
1	0.739662	0.746926	1.06508	0.913603	1.06589	1.15835	0.994623	1.1553	1.02593	1.0257	0.931831	0.991613									0.503213	0.67083	1.01459	0.74757	0.195002	1.01611	0.626776	0.847759	0.757871	0.955743	0.885916	1.00969
10	0.834829	0.829911	1.03045	0.922107	0.81953	0.848101	0.829039	0.780443	1.01386	0.751944											0.443129	0.413581	0.333256	0.437385	0.753737	1.44193	1.10796	1.05955	0.833849
100	0.479829	0.607539	0.886076	0.7312	1.02694	0.751735	0.889971	1.05167	0.844614	0.88072	0.678632	0.786306									0.059787	0.238214	0.317246	0.281678	0.19534	0.068599	0.735332	0.306493	0.216266	0.316424	0.172553	0.276664
250	0.155855	0.515003	0.879946	0.452613	0.681125	0.634489	0.536505	0.692887	0.585358	0.633982	0.536104	0.478514									0.046352	0.042827	0.33052	0.038489	0.040469	0.036965	0.041859	0.045641	0.064409	0.054022	0.047851	0.040282
1000	-0.04672	-0.01105	0.146233	0.108671	0.089881	0.071407	0.443951	0.034405	0.175212	0.015047	0.077619	0.044505	0.033544	0.085143	0.054321	-0.0132					0.019722	0.01549	0.093162	0.045258	0.032846	0.034258	0.015272	0.028899	0.01634	0.025085	0.023532	0.015159	0.027357	0.018309	0.022332
4000	-0.2534	0.023626	0.316458	0.024887	0.084712	0.003058	0.09758														0.017178	0.015879	0.030587	0.015815	0.024461	0.018386	0.028557
Gd3+	MET															MET															LEAK
0.0001	0.641692	0.458138	1.3549	1.44823	0.676003	2.00197	1.47113	1.46088	1.26968	0.596054	0.345612	0.345037	0.681995			0.728485	0.446286	0.873958	1.09109	0.542151	1.11465	1.07994	1.07095	1.28045	0.995234	1.37476	1.03762	1.40098
0.001	0.689857	0.423857	1.31404	1.45987	0.627923	1.85409	1.26202	1.37714	1.21857	0.590218	0.3647	0.337247	0.523225			0.704705	0.506233	0.872452	1.05502	0.530934	1.04923	0.999688	1.01127	1.27329	0.821973	1.21467	1.05562	1.27634
0.01	1.1163	1.179	1.22429	1.36935	1.29408	0.716355	0.658588									0.941612	0.91322	1.33586	0.843836	0.917702	0.467821	0.965165
0.1	1.47856	0.785039	1.00802	0.724379	1.48338	1.1873	0.907638	0.690894	0.573485	0.842936						0.545202	0.747211	0.624906	0.66994	1.05646	1.14425	0.892339	1.52427	1.00865	1.36565
1	1.52539	0.477449	0.773538	0.95862	1.10336	1.18844	0.768356	0.289823	0.32307	0.814826						0.884655	0.652916	0.51153	0.784823	0.876444	1.13265	0.833037	1.44153	0.917469	1.30616
10	1.35526	0.370516	0.563069	0.649171	0.846804	0.903908	0.419576	0.21573	0.411327	0.598102						0.621302	0.642183	0.471637	0.689197	0.790218	1.10545	0.804404	1.32724	1.01802	1.06784
100	0.609994	0.375748	0.282228	0.250314	0.72057	0.727584	0.394475	0.080242	0.100444	0.561037						0.721642	0.61781	0.477256	0.690617	0.838307	1.0601	0.788261	1.3899	0.916557	1.00074
500				0.029743	0.258031	0.089231	0.31808	0.036264	0.048045	0.348926									0.13241	0.796392	0.441411	0.73028	0.368995	0.36519	0.95419
1000	0.0224729	0.058908	0.02886	0.017407	0.055199	0.02918	0.059757	0.032576	0.019593	0.072841						-0.114113	0.465815	-2.2e-07	0.022361	0.137413	0.194307	0.420613	0.272144	0.04159	0.260761
2000	0.037573	0.024883	0.082599	0.019834	0.074911	0.045663	0.032323									-0.24412	0.044819	0.16097	0.039682	0.565086	0.065393	0.179462
4000	0.019579	0.018099	0.034864	0.018026	0.027881	0.020956	0.032549									-0.28567	0.026634	0.356759	0.028056	0.0955	0.003447	0.110007
La3+	leak															met
0.1	1.23364	0.846675	1.09631	1.20898	0.690688	0.801704	1.01826	1.64305								1.33384	0.992901	1.12866	1.38215	0.883345	0.57607	0.693506	1.26915
1	1.11811	0.868376	1.27323	1.47246	0.603418	0.778581	1.01946	1.4308								1.27353	0.99631	1.18377	1.35025	0.798968	0.478109	0.728148	1.20535
10	1.12973	1.0174	0.960629	0.934383	0.592761	1.19309	1.00616	0.98056								1.22634	0.933355	1.00013	1.41726	0.721264	0.674006	0.696982	1.09823
100	0.981206	0.958177	0.878417	0.961953	0.56836	0.68425	0.841203	1.82218								0.908292	0.670465	0.623679	0.890857	0.59646	0.430454	0.489079	1.05702
500	0.196927	0.609694	0.382314	0.713567	0.307674	0.46238	0.715233	1.56596								0.0862842	0.430482	0.178131	0.623585	0.184869	0.172154	0.293338	0.844016
1000	0.000757	0.046052	0.076595	0.005106	0.068029	0.076943	0.121339	0.278117								0.0171103	0.023309	0.017063	0.017979	0.026052	0.026481	0.030636	0.365794
2000	-0.24717	0.007086	0.365936	0.031141	0.070323	0.190893	0.040141									0.029032	0.019227	0.063823	0.015326	0.057883	0.035283	0.024976
4000	-0.14625	0.036892	0.23419	-0.02724	0.134692	0.130619	0.01314									0.015129	0.013985	0.026939	0.013929	0.021543	0.016193	0.02515
