# Supplementary material for: TMC1 is an essential component of a leak channel that modulates tonotopy and excitability of auditory hair cells in mice
Source: eLife journal article supplement (doi:10.7554/elife.47441), 2019-10-29
Supplement: supp [file elife-47441-supp-v1.zip › elife_poa_e47441_Figure_6_source_data_1.xlsx]

## Sheet: Figure 6ABD
Na+	Li+	Cs+		Na+	Ba2+	Zn2+	Co2+	Mg2+	Ca2+
-20.7381	-28.7835	-54.2472		-53.6638	-54.1329	-55.3866	-37.912	-78.2176	-2.6305
-22.8688		-37.0563		-57.7341	-60.5454	-101.062	-80.5498	-54.385	-14.5237
-38.8589	-26.7925	-65.5126		-48.6591	-52.8423	-70.2438	-66.3207	-53.2282	-3.93995
-23.3836	-26.0116	-65.5126		-47.0203	-61.4064	-65.9036	-49.6686	-51.3891	-19.3519
-39.9907	-19.8061	-46.5838		-36.4804	-42.1117			-64.0447	-2.50912
-32.9717	-22.6006			-56.9042	-59.6109			-78.8102	-3.57568
-40.9222	-21.3174			-45.3501					1.48915
-56.9264	-53.209			-66.5425					-3.7679
-53.7631	-44.0151			-73.0495					-3.9562
				-49.785
				Na+	Ca2+	Mg2+
				0.742778	8.3944e-18	0.380097
				0.854907	8.3944e-18	0.328722
				0.865455	0.0363649	0.44908
				0.865455	8.3944e-18	0.555105
				0.467861	8.3944e-18	0.230301
				0.644572	0.15324	0.473231
					8.3944e-18
					8.3944e-18
					8.3944e-18
					0.042088

## Sheet: Figure 6FG
	ILeak																				IMET
0.1	1.12593	0.776481	0.988849	0.785383	0.628601	0.703108	1.9443	2.15175	2.0003	1.39402	0.869288	1.10286	0.79344	0.651229	0.840374	1.25893	0.4171	0.62593	0.614226	0.453824
0.5	0.980923	0.41898	0.833041	0.945858	0.490512	0.705526	1.82109	1.73012	1.70175	0.876908	0.798201	0.774398	0.757457	0.657978	0.930658	1.27135
1.3	0.688517	0.402082	0.543734	0.559949	0.441332	0.410884	1.02027	1.10423	1.3022	0.489232	0.622752	0.611632	0.698411	0.602872	0.631086	0.887076					0.749607	1.32106	1.11301	1.19865	0.405917	0.54344	1.00628	1.54202	1.12003
10	0.118579	0.177498	0.144676	0.230202	0.303779	0.308416	0.363134	0.173453	0.358824												0.0387328	0.130305	0.753782	1.20755	0.406046	0.590939	0.714584	1.10141	0.758881
35	0.140428	0.222679	0.170786	0.392045	0.15398	0.195968	0.16873	0.052844	0.275442												0.124641	0.708847	0.814844	0.926415	0.330413	0.60054	0.515776	1.14615	0.765626
75	0.033653	0.185809	0.050406	0.247579	0.0321	0.045745	-0.01905	0.048205	0.050614												0.251677	0.781813	0.859309	0.743581	0.340562	0.567132	0.543611	1.23168	0.888724
	WT										TMC1KO
1.3	-32.6025	-48.9256	-48.0108	-35.473	-47.5703	-52.5732	-42.1695	-49.0463	-79.0609		-6.40688	-5.70183	-4.39891	-4.70006	-7.4307	-6.44852	-3.08934	-4.04295
10	-9.2687	-13.8741	-11.3086	-17.9937	-23.7448	-24.1072	-28.3843	-13.5579	-28.0474		-7.30797	-14.1774	-6.90206	-4.59872	-33.1178	-4.6642	-4.28979	-4.47684
35	-10.9765	-17.4056	-13.3494	-30.6441	-12.0358	-15.3178	-13.1887	-4.13053	-21.5298		-10.8477	-18.0922	-10.6681	-7.58051	-39.8369	-6.49295	-5.63678	-4.89108
75	-2.6305	-14.5237	-3.93995	-19.3519	-2.50912	-3.57568	1.48915	-3.7679	-3.9562		-10.4022	-12.6645	-9.67593	-5.86089	-29.2196	-4.76047	-5.03143	-4.32282
