# Supplementary material for: TMC1 is an essential component of a leak channel that modulates tonotopy and excitability of auditory hair cells in mice
Source: eLife journal article supplement (doi:10.7554/elife.47441), 2019-10-29
Supplement: supp [file elife-47441-supp-v1.zip › elife_poa_e47441_Figure_7_source_data_1.xlsx]

## Sheet: Figure 7
B				C			D			G			H
wild-type bursting	wild-type non-bursting	Tmc1 KO		wild-type	Tmc1 KO		wild-type	Tmc1 KO		wild-type	Tmc1 KO		wild-type	Tmc1 KO
-45.815	-57.5437	-76.8775		6.03333	0		-12.3113	-23.704		-48.95	-45.7661		-22.657	22.6682
-52.22	-60.4651	-73.3499		1.66667	0		-6.6112	-19.6612		-47.6418	-44.7657		21.3485	18.4148
-58.05	-69.2655	-69.0059		1.06667	0		-8.20419	-16.1317		-46.2975	-47.2666		14.681	18.1481
-43.92	-54.0851	-63.3626		6.03333	0		-23.9785	-15.0866		-44.3281	-51.3618		1.6127	6.668
-41.5234	-49.832	-72.648		5.8	0		-15.9119	-11.3562		-51.323	-47.9231		-16.2562	31.2164
-42.53	-68.458	-67.896		2.825	0		-33.2159	-8.54407		-48.5483	-47.2354		-0.12666	29.6162
-53.204	-62.254	-80.157		1.93333			-26.1993	-6.32126		-47.7043
-52.95	-58.468	-75.642		1.25			-37.3568	-14.2347		-40.0453
	-61.808	-80.457		2.55			-26.1085	-11.8829		-50.86
	-59.6743	-69.487					-31.0564	-6.2304
							-42.2794	-1.2752
							-24.6854	-1.3914
							-20.593	-2.3434
							-32.7373	-1.2066
							-22.4801
							-23.1895	-0.8308
							-26.0612	-3.995
							-24.2144
							-26.9274
							-32.3454
I
	TMC1KO IHC P6										WT IHC P6
-50	0	0	0	0	0	0	0	0	0		0	0	0	0	0	0	0	0
-25	0	0	0	0	0	0	0	0	0		0	0	0	0	0	0	0	0
0	0	0	0	0	0	0	0	0	0		2	0	0	3	0	0	5	0
25	0	0	10	8	7	1	9	4	7		8	12	9	10	6	6	12	10
50	6	5	13	14	13	11	13	9	11		10	13	9	11	13	14	14	14
75	10	10	13	16	14	13	15	11	12		11	14	10	12	14	15	14	15
100	9	9	13	16	15	14	15	12	14		12	15	11	12	14	15	12	15
125	8	8	13	17	16	16	15	13	13		13	15	11	12	16	15	12	15
