# Supplementary material for: TMC1 is an essential component of a leak channel that modulates tonotopy and excitability of auditory hair cells in mice
Source: eLife journal article supplement (doi:10.7554/elife.47441), 2019-10-29
Supplement: supp [file elife-47441-supp-v1.zip › elife_poa_e47441_Figure_8_figure_supplement_1_source_data_1.xlsx]

## Sheet: Fig8-supplement1
P3	P6	P14	P3	P6	P14
-22.5162	-38.3619	-82.3031	-10.4403	-32.028	-51.086
-6.20944	-65.4194	-146.083	-18.7395	-21.8493	-24.4538
-25.1275	-66.7191	-151.852	-7.98291	-19.4134	-18.2854
-7.4198	-63.082	-126.925	-10.0113	-14.8609	-29.9022
-20.1208	-60.6417	-108.984	-13.0898	-11.8778	-14.4128
-18.3263	-104.644	-185.162	-1.28539	-8.39308	-0.7748
-32.2475	-86.2872	-249.606	-6.74236	-32.8001
-76.941	-64.6112	-51.6804		-27.2946
	-59.0811	-64.2996		-22.6338
	-69.7514	-72.68		-12.023
	-57.7787	-109.809		-22.4589
	-54.9194	-71.3908		-13.0784
		-60.501		-10.956
		-65.5829		-10.6861
		-90.3732		-15.234
				-9.78329
