# Supplementary material for: TMC1 is an essential component of a leak channel that modulates tonotopy and excitability of auditory hair cells in mice
Source: eLife journal article supplement (doi:10.7554/elife.47441), 2019-10-29
Supplement: supp [file elife-47441-supp-v1.zip › elife_poa_e47441_Figure_8_source_data_1.xlsx]

## Sheet: Figure 8
C
WT				TMC1 KO
D05	D20	D40	D60	D05	D20	D40	D60
-8.56309	-38.3619	-56.123	-92.3656	-17.4808	-32.028	-5.70825	-4.99577
-7.21475	-65.4194	-103.613	-71.0068	-16.5976	-21.8493	-9.55715	-3.86115
-43.8966	-66.7191	-99.4351	-114.541	-32.5456	-19.4134	-8.81346	-9.35742
-18.5911	-63.082	-62.8966	-97.4816	-6.96657	-14.8609	-8.85173	-6.18782
-17.5753	-60.6417	-56.9588	-105.106	-21.4351	-11.8778	-20.0752	-4.70577
-49.693	-104.644	-87.6597	-98.371	-18.0961	-8.39308	-5.14716	-0.79313
-33.3913	-86.2872	-76.4242	-81.3044	-20.3701	-32.8001	-8.74717
-17.5763	-64.6112	-39.8185	-78.4647	-8.29677	-27.2946
-22.6569	-59.0811	-63.0197	-48.2594		-22.6338
-16.7977	-69.7514	-52.9846	-48.4123		-12.023
-20.3686	-57.7787	-43.002			-22.4589
	-54.9194				-13.0784
	-71.683				-10.956
	-40.4547				-10.6861
	-56.7287				-15.234
	-52.0334				-9.78329
E
WT+1.3Ca				TMC1 KO + 1.3Ca				WT + 35Ca
D05	D20	D40	D60	D20	D40	D60	D80	D05	D20	D40	D60
-374.569	-763.226	-886.397	-878.185	-416.556	-230.444	-189.856	-109.3	-356.524	-360.345	-335.767	-323.12
-564.744	-940.743	-873.722	-967.667	-410.1	-217.389	-112.4	-80.2778	-350.66	-393.864	-317.729	-345.911
-468.201	-761.713	-935.827	-991.585	-487.411	-200.922	-101.222	-69.0778	-349.271	-412.269	-309.863	-389.39
-471.584	-754.313	-855.846	-941.315	-361.256	-152.467	-112.544	-128.211	-371.836	-374.418	-429.749	-521.294
-540.959	-866.277	-808.097	-908.925	-254.867	-150.033	-105.078	-116.589	-416.641	-339.242	-421.899	-495.443
-506.203	-762.644	-899.579	-1018.47	-297.144	-109.522	-80.3444	-111.133		-333.142	-491.677	-606.526
-673.985	-724.367	-744.895	-1058.18								-515.243
-690.536	-711.448	-976.351	-856.954								-495.456
-324.548	-816.775	-896.739	-857.466								-457.85
-435.957	-700.086	-845.957	-909.166
