# Supplementary material for: TMC1 is an essential component of a leak channel that modulates tonotopy and excitability of auditory hair cells in mice
Source: eLife journal article supplement (doi:10.7554/elife.47441), 2019-10-29
Supplement: supp [file elife-47441-supp-v1.zip › elife_poa_e47441_Figure_9_Source_Data_1.xlsx]

## Sheet: Figure 9B
WTP6D05 3Ca	WTP6D2 3Ca	WTP6D6 3Ca	WTP6D05 35 Ca	WTP6D2 35 Ca	WTP6D6 35 Ca
-5.9306	-7.48874	-10.0912	-4.8731	-3.63536	-4.8635
-8.05382	-7.88192	-10.6414	-4.76996	-4.55665	-3.81536
-5.65811	-7.04761	-12.438	-5.0806	-2.95804	-5.29214
-3.45665	-9.78513	-10.4098	-5.74053	-5.1545	-4.97825
-6.06189	-8.33727	-9.33733	-4.56081	-6.8437	-3.77367
-6.14573	-7.55078	-9.41358	-4.89109	-5.85964	-4.22173
-6.69768	-4.42054	-10.5884	-4.20021	-4.35707	-5.03575
-4.85758	-7.47196	-11.5923	-4.29531	-3.83092	-6.33188
-5.82633	-8.34006	-10.6758	-3.87441	-4.37259	-4.30918
-5.32431	-9.71899	-12.1531	-4.97631	-4.35814	-7.37958
-6.52623	-7.97895	-10.7175	-5.66881	-5.59495	-5.51193
-4.75268	-6.74906	-8.04386	-4.92174	-4.76875	-4.20404
-4.48734	-4.94821	-9.76692	-3.88767	-4.64704	-4.58543
-3.10129	-8.55548	-10.4299	-6.45594	-4.6836	-4.60269
-4.87702	-4.96205	-9.67626	-7.70695	-5.03653	-4.57121
-3.74887	-5.24251	-10.3535	-2.87673	-3.39815	-4.66324
-3.88865	-7.66393	-8.58646	-3.4755	-3.22796	-3.74473
-3.70016	-6.64121	-10.2591	-3.87498	-3.93358	-3.88492
-4.71796	-5.7986	-9.22894	-3.82428	-4.75307	-3.4971
-4.83424	-5.39776	-8.58265	-4.8533	-3.78285	-4.30491
-5.83097	-8.38614	-10.9248	-5.49806	-6.74841	-4.90785
-4.33514	-7.91354	-8.81336	-3.0609	-3.76819	-4.15991
-8.64655	-10.1976	-10.2773	-3.64318	-4.05137	-5.14831
-9.81977	-4.64201	-6.87616	-3.59191	-3.92805	-4.62499
-9.47793	-5.36602	-10.6019	-5.04172	-4.45735	-6.65613
-10.9192	-8.50768	-10.152	-4.19753	-4.9615	-5.51888
-8.68616	-7.75757	-12.89	-5.04692	-5.02343	-5.02009
-9.35852	-8.00685	-11.5218	-4.44611	-4.7292	-4.95204
-5.65943	-6.92754	-7.06742	-5.15608	-4.45566	-5.15752
-9.23254	-9.43764	-7.98326	-3.68645	-4.61774	-5.71117
-9.37662	-6.68404	-9.54115	-5.20557	-4.83867	-5.66829
-9.91697	-6.6019	-11.1677	-5.27024	-4.91102	-4.87647
-8.128	-5.07451	-8.91526	-4.78561	-3.69062	-5.43918
-9.59159	-7.79637	-12.597	-5.05414	-3.24889	-6.97814
-8.41282	-5.19744	-8.39614	-6.03017	-5.16662	-4.16086
-9.05427	-9.42763	-8.75665	-6.53397	-7.83763	-4.51606
-5.68032	-9.58563	-11.7419	-3.89848	-5.51722	-4.51192
-8.78	-7.0816	-9.12343	-3.89341	-4.00931	-3.90322
-5.25096	-10.2246	-8.76515	-4.69876	-4.19186	-3.11315
-4.68645	-8.70997	-11.9889	-4.93581	-7.00483	-4.43571
-5.61352	-8.2818	-9.63768	-3.49819	-3.98394	-5.41871
-7.0442	-8.00778	-9.01755	-4.03	-4.26584	-4.54626
-7.89665	-9.16335	-11.571	-5.15527	-5.78839	-5.07859
-5.37154	-9.7018	-11.0442	-2.10678	-6.52101	-5.75535
-7.03106	-7.69947	-9.08168	-2.41377	-5.59445	-4.94966
-8.99716	-10.3101	-8.97365	-3.58857	-4.5735	-6.55924
-6.53256	-8.32215	-12.4252	-7.4828	-7.0033	-5.53408
-4.69313	-8.35249	-11.3364	-4.22114	-6.27763	-4.42516
-6.79778	-10.6814	-17.176	-4.91443	-5.54594	-5.1763
-4.42968	-11.2716	-10.4064	-5.69096	-4.6921	-5.46382
-5.84743	-6.23237	-12.0282	-6.34002	-3.07857	-5.38717
-6.68008	-7.57041	-12.8681	-5.33907	-4.42368	-6.2005
-9.8014	-7.47955	-11.7158	-4.90599	-3.38182	-7.91201
-9.52168	-8.17844	-16.3698	-5.13274	-4.28108	-6.04263
-7.08132	-9.01969	-13.0635	-4.5434	-5.93344	-4.7619
-7.08005	-6.60341	-14.6615	-7.62435	-3.82975	-3.25397
-7.72435	-5.62679	-10.891	-6.8291	-5.6943	-4.52349
-6.22014	-7.79796	-10.3381	-3.36194	-5.15269	-4.97156
-5.76255	-9.58047	-8.88836	-5.19017	-3.83874	-5.16933
-10.1438	-8.88941	-8.40195	-3.68696	-5.0173	-5.56123
-6.65393	-8.39556	-6.8835	-6.71557	-5.07933	-4.2047
-6.30606	-8.0185	-9.37043	-5.43054	-6.01394	-6.40068
-8.11008	-6.96328	-8.23191	-4.45053	-4.0648	-7.70327
-4.29202	-9.19633	-14.7234	-3.08909	-4.37318	-3.92693
-5.97575	-7.35291	-11.2338	-3.18296	-2.6493	-4.97921
-7.32997	-8.78784	-13.1847	-4.76112	-3.00535	-3.70586
-8.23084	-5.64553	-14.0826	-3.81361	-4.78364	-3.10338
-5.15843	-8.71756	-10.2054	-4.01058	-4.95271	-6.20015
-6.04767	-7.4345	-12.7829	-4.81326	-5.56404	-4.48835
-10.4527	-7.69021	-10.5942	-5.67098	-7.1216	-7.87921
-5.556	-8.37381	-10.0239	-4.57198	-4.49898	-5.22581
-7.15086	-8.03123	-13.6001	-4.60365	-6.71949	-3.62289
-8.28794	-7.41459	-11.6147	-3.4318	-7.3102	-3.04919
-9.75852	-6.62809	-9.6641	-3.08694	-5.07943	-5.01493
-7.36832	-6.66049	-9.25183	-3.96674	-4.27858	-3.02407
-5.1922	-5.57852	-9.20641	-3.62624	-4.98558	-5.35335
-9.05262	-8.53667	-11.1106	-5.07464	-7.26187	-2.76688
-7.93349	-8.64442	-9.65893	-5.34828	-4.89709	-5.26846
-6.8416	-11.0137	-7.6501	-3.41144	-4.66659	-4.72964
-7.08893	-9.00045	-8.81344	-2.70992	-6.41128	-4.88119
-8.40172	-8.199	-11.356	-4.88464	-5.86685	-3.75193
-4.6932	-6.48322	-11.7685	-5.8667	-5.41173	-4.71644
-9.22949	-8.55666	-9.49227	-3.38905	-5.08784	-6.14692
-6.73183	-8.63756	-9.33914	-4.50552	-3.77738	-4.9844
-9.10215	-10.9563	-11.1135	-4.67078	-3.4355	-6.43052
-6.14645	-9.70352	-12.3196	-6.05386	-3.74317	-6.8761
-9.1835	-6.40064	-12.8834	-4.16147	-3.56742	-5.2076
-9.0595	-4.6865	-12.161	-3.63807	-5.51776	-4.92258
-6.0423	-8.9244	-12.8455	-5.38145	-4.26082	-4.24112
-8.6131	-8.51041	-10.8664	-4.61905	-5.18882	-2.79783
-9.52467	-12.6501	-12.0128	-5.53025	-4.13356	-4.893
-10.8076	-6.90597	-8.7425	-3.48462	-3.93163	-3.8291
-5.96176	-6.79752	-8.55319	-3.95258	-3.74654	-5.65859
-8.80401	-8.97502	-10.2822	-3.01179	-5.26888	-3.95997
-4.49599	-7.99679	-10.1642	-5.46163	-5.72829	-6.56087
-8.11571	-7.54372	-8.70281	-5.1202	-5.01769	-3.76254
-7.50307	-11.2394	-12.1393	-5.46054	-3.84656	-3.68709
-5.18816	-8.54293	-9.01892	-7.76853	-3.83681	-3.66542
-8.79984	-6.71378	-10.2413	-6.33055	-3.61701	-4.82639
-8.76135	-7.35693	-12.2394	-5.78194	-4.68296	-5.99708
-8.08137	-9.50932	-13.0572	-5.61649	-3.64523	-5.26543
-7.27188	-8.65951	-15.3721	-3.53196	-4.26503	-6.82974
-7.39776	-8.58183	-8.38603	-6.47729	-4.16615	-4.44019
-10.5362	-12.6075	-8.10064	-6.16891	-3.36536	-6.67955
-9.01277	-12.9494	-7.92121	-5.8586	-4.37291	-5.08165
-9.72503	-11.3617	-10.8019	-6.36393	-5.17714	-4.60599
-8.07489	-10.9642	-10.2493	-5.56047	-5.47316	-5.36675
-6.47674	-8.60532	-16.3733	-5.25982	-6.2085	-5.58138
-7.43215	-10.5729	-12.6416	-6.11901	-3.81991
-9.10963	-9.98392	-16.6257	-5.4373	-4.23052
-7.29392	-10.8112	-15.9488	-3.05469	-5.35168
-7.71515	-11.654	-11.069	-4.32449	-5.30858
-6.62522	-9.93843	-16.8985	-3.89146	-7.00395
-6.8653		-17.3765	-4.27873	-7.79777
-6.26214		-17.0061	-5.31212	-5.13536
-8.07459				-5.64356
