# Supplementary material for: TMC1 is an essential component of a leak channel that modulates tonotopy and excitability of auditory hair cells in mice
Source: eLife journal article supplement (doi:10.7554/elife.47441), 2019-10-29
Supplement: supp [file elife-47441-supp-v1.zip › elife_poa_e47441_Table_1_source_data_1.xlsx]

## Sheet: Figure 1C
wild-type	Tmc1 KO
-101.612	-41.3919
-107.265	-29.9392
-79.0529	-26.7062
-96.4581	-19.0957
-76.9585	-13.5088
-61.1567	-9.192
-57.8142	-42.538
-52.3518	-33.5609
-49.166	-21.7537
-57.113	-9.75523
-58.7189	-18.6501
-74.6606	-13.7572
	-12.6009
	-13.0524
	-17.1423
	-12.6712

## Sheet: Figure 1D
wild-type	Tmc1 KO
-2.44418	-9.36389
-2.28003	-8.08988
-9.08321	-7.29276
-10.12	-4.23484
-6.67426	-1.63105
-8.98091	-0.798919
-9.93954	-9.73792
-1.27628	-2.88791
-7.60068	0.382739
-11.698	-1.67134
-2.66368	-6.26633
-7.51457	0.880062
	-0.678826
	-1.64494
	-2.36632
	-1.90832

## Sheet: Figure 1E
wild-type	Tmc1 KO
-94.9377	-32.028
-98.2841	-21.8493
-76.4242	-19.4134
-86.5186	-14.8609
-61.0043	-11.8778
-68.5261	-8.39308
-50.2135	-32.8001
-55.0063	-27.2946
-47.8897	-22.6338
-62.8966	-12.023
-56.9588	-22.4589
-87.6597	-13.0784
	-10.956
	-10.6861
	-15.234
	-9.78329

## Sheet: Figure 1G
	wild-type
	NaCl													NMDG
-150	-165.774	-152.808	-164.246	-127.471	-212.349	-304.063	-373.21	-128.876	-136.839	-119.749	-192.883	-156.093		-53.9329	-41.7445	-47.9555	-46.2355	-45.6994	-68.4597	-98.6864	-61.2922	-70.7612	-50.94	-80.0211	-67.0223
-130	-126.38	-109.087	-128.654	-98.7397	-160.423	-237.828	-285.586	-98.8982	-99.6532	-89.7271	-138.207	-124.281		-34.9272	-29.4801	-32.0157	-33.1752	-30.1496	-48.3995	-72.0938	-41.738	-46.4754	-34.288	-51.975	-45.5497
-110	-91.6824	-82.7429	-98.825	-74.4657	-124.351	-184.9	-222.995	-76.4126	-73.6003	-67.2609	-103.734	-94.0305		-22.7386	-18.9434	-22.5365	-23.6277	-17.1919	-33.3443	-48.8097	-27.7403	-28.4376	-20.3641	-35.1257	-32.0563
-90	-63.1089	-61.5924	-73.5318	-54.7425	-90.2215	-140.18	-169.395	-58.9057	-52.1934	-49.4781	-76.8454	-71.0406		-11.4195	-11.8493	-13.3254	-14.6109	-7.64906	-19.2362	-30.8119	-16.9307	-15.6873	-11.4251	-22.5158	-18.8462
-70	-44.6875	-42.5336	-53.7248	-39.375	-62.9764	-99.8628	-119.48	-41.6204	-31.9421	-35.1779	-52.5041	-50.6854		-1.44922	-5.20296	-7.07478	-5.99934	1.07411	-6.55488	-15.9724	-8.84317	-6.76812	-5.31161	-13.5947	-8.98504
-50	-27.2311	-28.1396	-35.6388	-23.8075	-40.4185	-67.8969	-84.648	-28.1269	-22.6279	-23.3858	-34.4297	-32.646		6.17522	0.433536	-0.45179	0.649974	9.18112	5.2467	-1.55969	-0.58399	1.29468	0.437424	-1.72996	-0.10037
-30	-17.0067	-10.9283	-21.3025	-14.8116	-18.4401	-34.385	-43.9632	-16.5645	-10.1683	-16.761	-17.4747	-19.7548		5.90151	5.90929	3.27194	1.04964	16.5398	17.6404	14.6155	4.36528	5.27848	0.242793	6.52415	2.73633
-10	23.4028	24.3976	7.22808	15.9813	13.8646	5.05012	2.90853	-6.09536	9.5203	-0.13364	6.94256	3.09016		38.7323	35.2982	20.0704	25.0193	32.6232	37.9667	37.5127	10.1375	21.3735	10.3227	20.596	17.374
10	80.3512	68.5691	46.489	66.3842	59.6009	53.8814	60.2207	29.7531	48.9335	38.3262	47.8606	48.3187		92.978	76.6597	52.3208	68.9375	63.0307	70.7708	74.7879	42.0797	54.5828	43.9662	57.829	54.8204
30	143.762	116.33	89.1774	116.49	108.738	105.663	120.927	85.5351	92.044	85.8542	96.8588	102.289		150.249	122.181	91.6255	114.205	103.144	108.861	118.213	92.8919	95.9533	87.0167	104.157	102.479
50	213.258	176.233	144.725	166.341	157.398	167.654	182.694	144.023	139.997	134.479	147.413	154.576		217.425	177.787	133.965	158.876	144.247	160.068	175.704	147.52	140.105	132.708	151.749	151.362
70	308.116	256.234	213.069	219.588	217.691	237.317	268.704	199.202	191.972	178.614	209.105	205.469		311.08	253.87	203.557	203.837	193.332	225.029	247.208	197.698	184.075	181.092	197.929	198.202
90	435.651	372.531	311.453	292.505	302.011	334.336	383.875	250.987	244.478	233.142	275.24	283.187		438.756	367.258	286.582	271.847	275.774	317.837	360.608	248.651	242.491	229.74	254.503	258.438
110	603.313	523.865	426.039	405.992	417.05	448.188	536.306	314.814	327.964	293.491	358.795	361.866		605.975	518.63	409.451	375.02	400.935	458.287	529.661	314.046	309.645	292.053	355.439	360.28
	Tmc1 KO
	NaCl													NMDG
-150	-30.2727	-47.3728		-113.277	-76.9146	-64.9615	-46.2708	-51.0534	-39.6849	-32.6739	-47.3278	-64.3017		-32.2236	-44.3546	-56.225	-83.1121	-49.3637	-54.6437	-32.1483	-45.2219	-31.3119	-37.5997	-35.6865	-42.6283
-130	-20.8628	-32.6378	-52.5337	-93.7994	-60.4017	-51.2365	-33.9408	-35.5239	-28.7095	-23.0722	-36.6017	-58.6745		-22.2433	-35.7299	-45.5348	-71.3307	-45.0757	-47.4286	-22.1474	-32.5829	-21.8466	-25.6454	-28.1918	-27.4615
-110	-14.8564	-22.3243	-49.5794	-70.6826	-44.029	-36.3815	-22.8294	-23.4714	-18.2098	-12.7003	-22.8709	-42.7349		-15.0685	-22.8369	-23.0807	-53.5702	-25.7623	-25.2292	-10.9558	-20.9249	-13.9953	-16.4728	-16.9548	-19.2744
-90	-9.13701	-11.7211	-32.6237	-58.849	-29.9101	-25.0211	-12.2925	-12.4455	-10.6811	-5.36497	-16.4727	-32.7021		-8.65228	-13.2392	-17.5783	-39.2731	-18.7106	-17.6481	-3.84094	-9.4237	-7.27032	-7.13397	-12.3668	-11.9867
-70	-2.55645	-4.57967	-17.4732	-40.1306	-20.5886	-13.0827	-3.72154	-3.02906	-4.05374	0.740237	-7.33703	-19.2974		-1.60529	-6.18201	-7.50743	-25.5983	-12.2676	-8.97925	4.43862	-1.34567	-0.60714	-0.00161	-4.62482	-5.21209
-50	3.21511	-0.21858	-7.35433	-24.8455	-11.021	-4.77887	3.74607	5.51185	1.54684	6.15616	0.877719	-9.60661		2.72321	0.603912	-1.07125	-13.3925	-3.51441	-0.53566	11.2759	7.64422	4.10925	6.50525	2.23259	0.767914
-30	1.25041	-2.47728	-4.10167	-15.8394	-4.48529	-4.53956	9.97449	11.7791	6.7342	8.56158	2.66702	-4.25129		1.46654	-1.74547	0.473747	-6.70956	-1.64836	-0.68977	17.135	12.9091	6.0894	9.55359	4.57556	2.2768
-10	1.33407	-3.54571	-2.53566	-5.82638	5.70858	-6.09235	22.6742	20.6518	13.1335	6.58614	4.05392	1.75907		1.00486	-7.43407	-3.25102	-1.94905	3.39815	-2.2865	27.3018	18.8713	4.97674	7.80797	5.29245	2.30648
10	32.2458	26.9187	34.2058	36.4104	40.562	33.2513	56.8564	54.8407	38.7435	24.9311	32.8356	34.8501		31.7332	19.0464	26.8904	32.5831	36.41	32.1756	59.7528	48.4701	26.8875	26.396	35.5411	30.6257
30	77.9662	72.1024	90.1338	91.6428	79.083	87.0568	105.006	106.337	80.5411	65.1158	79.9582	85.4048		73.1114	64.438	75.1402	81.7022	79.8617	80.939	110.09	97.0272	67.61	68.5217	77.3786	79.7577
50	117.582	113.956	139.328	131.841	119.007	133.811	148.213	155.343	127.292	107.853	132.773	130.668		112.92	105.314	117.014	124.887	122.046	122.038	157.288	140.958	109.943	110.102	130.261	125.045
70	152.602	144.01	188.063	158.909	159.509	172.799	198.917	204.957	180.352	150.991	193.67	178.381		143.609	132.767	153.29	157.463	158.635	165.928	207.126	194.119	161.022	148.912	189.432	170.595
90	181.447	178.267	225.745	183.914	190.162	219.367	248.16	253.327	228.726	203.247	271.733	218.413		179.036	159.604	188.426	193.237	195.573	199.402	265.339	251.136	212.741	186.93	249.625	219.919
110	235.73	205.218	271.717	238.171	236.002	265.183	292.369	301.516	303.246	260.15	343.314	271.125		213.827	194.259	226.558	217.941	246.355	248.819	339.119	316.291	270.606	248.519	319.742	283.336

## Sheet: Figure 1H
wild-type	Tmc1 KO
-17.0242	-63.229
-18.3582	-53.6849
-7.73253	-25.0215
-15.3627	-2.25314
-10.8491	-20.8623
-3.76811	-18.7941
-2.52907	-53.7301
-4.53288	-52.9684
-16.9118	-51.9737
-9.22233	-61.2881
-11.0677	-38.1468
-7.2354	-17.8707

## Sheet: Figure 1I
	WT													C1KO
-150	-111.841	-111.064	-116.291	-81.2355	-166.65	-235.603	-274.524	-67.5838	-66.0778	-68.809	-112.862	-89.0707		1.9509	-3.0182		-30.1649	-27.5509	-10.3178	-14.1225	-5.8315	-8.373	4.9258	-11.6413	-21.6734
-130	-91.4528	-79.6069	-96.6383	-65.5645	-130.273	-189.429	-213.492	-57.1602	-53.1778	-55.4391	-86.232	-78.7313		1.3805	3.0921	-6.9989	-22.4687	-15.326	-3.8079	-11.7934	-2.941	-6.8629	2.5732	-8.4099	-31.213
-110	-68.9438	-63.7995	-76.2885	-50.838	-107.159	-151.555	-174.185	-48.6723	-45.1627	-46.8968	-68.6083	-61.9742		0.2121	0.5126	-26.4987	-17.1124	-18.2667	-11.1523	-11.8736	-2.5465	-4.2145	3.7725	-5.9161	-23.4605
-90	-51.6894	-49.7431	-60.2064	-40.1316	-82.5724	-120.944	-138.583	-41.975	-36.5061	-38.053	-54.3296	-52.1944		-0.48473	1.5181	-15.0454	-19.5759	-11.1995	-7.373	-8.45156	-3.0218	-3.41078	1.769	-4.1059	-20.7154
-70	-43.2383	-37.3306	-46.65	-33.3757	-64.0505	-93.3079	-103.508	-32.7772	-25.174	-29.8663	-38.9094	-41.7004		-0.95116	1.60234	-9.96577	-14.5323	-8.321	-4.10345	-8.16016	-1.68339	-3.4466	0.741848	-2.71221	-14.0853
-50	-33.4063	-28.5731	-35.187	-24.4575	-49.5996	-73.1436	-83.0883	-27.5429	-23.9226	-23.8232	-32.6997	-32.5456		0.4919	-0.82249	-6.28308	-11.453	-7.50659	-4.24321	-7.52983	-2.13237	-2.56241	-0.34909	-1.35487	-10.3745
-30	-22.9082	-16.8376	-24.5744	-15.8612	-34.9799	-52.0254	-58.5787	-20.9298	-15.4468	-17.0038	-23.9989	-22.4911		-0.21613	-0.73181	-4.57542	-9.12984	-2.83693	-3.84979	-7.16051	-1.13	0.6448	-0.99201	-1.90854	-6.52809

## Sheet: Figure 2D
eGFP	C1df OE	C1 OE
-25.3273	-25.9415	-20.5372
-8.8712	-6.74825	-84.1957
-10.3476	-12.3323	-35.9534
-14.2881	-16.7597	-44.565
-5.54252	-4.88037	-34.9914
-29.3396	-13.201	-31.847
-25.0834	-5.9668	-32.4313
-21.6532	-10.3529	-55.6991
	-34.9691
	-20.663
	-19.6463

## Sheet: Figure 2F
P1		P3		P6
wild-type	Tmc2 KO	wild-type	Tmc2 KO	wild-type	Tmc2 KO	Lhfpl5 KO
-0.59593	-0.348922	-22.5162	-35.9881	-38.3619	-73.3124	-25.7275
-0.0387	0.0794427	-6.20944	-34.4721	-65.4194	-50.9759	-17.5763
0.10397	0.377988	-25.1275	-15.6923	-66.7191	-64.4884	-22.6569
-2.45715	-0.11321	-7.4198	-22.527	-63.082	-46.866	-16.7977
-2.40653	0.033323	-20.1208	-23.5758	-60.6417	-49.0463	-20.3686
-0.45537		-18.3263		-104.644	-74.4393	-6.79015
-0.65939		-32.2475		-86.2872	-79.4098	-7.96265
				-64.6112	-95.133	-8.3356
				-59.0811	-120.392	-5.2099
				-69.7514	-79.0609	-11.8829
				-57.7787		-11.2579
				-54.9194		-9.11989

## Sheet: Figure 3C
Background	FJ-NMDG	DHS-NMDG
-103.577	-52.2458	-48.8286
-88.9408	-46.8941	-49.155
-102.016	-61.6298	-61.767
-120.827	-83.4811	-98.5004
-109.133	-88.6599	-60.6081
-122.1	-94.2274	-57.9458
-108.357	-67.9174	-59.6138
-151.507	-81.5949	-80.6086

## Sheet: Figure 3D
0.1	0.3	0.5	1.3	3.0
0.133655	0.545878	0.380762	0.985671	0.814349
0.306771	0.573299	0.585372	0.985653	1.06481
0.192509	0.300343	0.511569	0.923454	0.881015
0.554548	0.359826	0.919817	1.00167	1.04279
0.232576	0.239822	0.425063	1.02835	0.995865
0.376231	0.308404	0.295185	0.869081	0.920721
0.322894	0.596962	0.479584	1.1862	0.947907
0.280166	0.694305	0.405592	0.983723	0.987653
0.181408	0.42981	0.24746	0.977317	1.00131
			1.03818
			1.08469
			1.05012
			1.03745
			0.945438
			1.01301
			0.888074
			1.32286
			0.602608

[truncated: 11 more sheets: Figure 3E, Figure3-Supplement 1B, Figure 4D, Figure4-supplement 1A, Figure 4BCDFH, Figure 6ABD, Figure 6FG, Figure 7, Figure 8, Fig8-supplement1, Figure 9B]
